# Supplementary material
Source: PubMed Central journal article supplement (PMC5411501)
Supplement: AEM.03446-16_zam999117822s1.pdf [file AEM.03446-16_zam999117822s1.pdf]

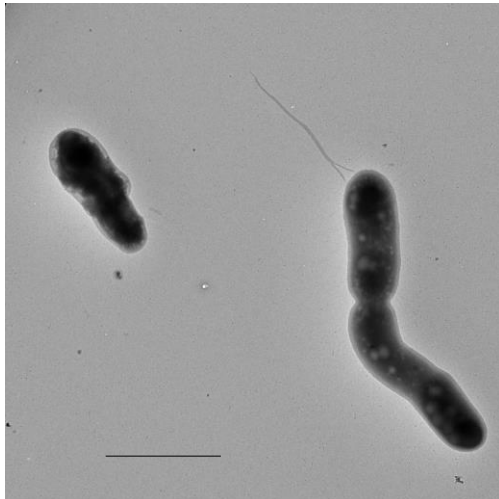

Supplemental Figure S1. Transmission electron micrograph of *Trigonella suavissima* strain CC2017. Bar = 2.0  $\mu\text{m}$

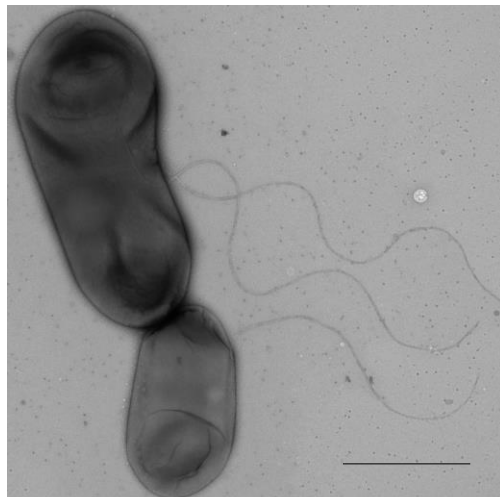

Supplemental Figure S2. Transmission electron micrograph of *Trigonella suavissima* strain CC2155b. Bar = 1.0  $\mu\text{m}$ .

TABLE S1. Allelic number codes for each of the ten loci in the 61 *Ensifer* chromosomal sequence types (CSTs).

| CST | Allele number codes for each locus <sup>a</sup> |            |            |             |            |              |              |             |             |            |
|-----|-------------------------------------------------|------------|------------|-------------|------------|--------------|--------------|-------------|-------------|------------|
|     | <i>asd</i>                                      | <i>edD</i> | <i>gap</i> | <i>glnD</i> | <i>gnd</i> | <i>nuoE1</i> | <i>ordL2</i> | <i>recA</i> | <i>sucA</i> | <i>zwf</i> |
| 1   | 22                                              | 26         | 11         | 15          | 19         | 3            | 12           | 5           | 14          | 12         |
| 2   | 22                                              | 26         | 11         | 17          | 19         | 3            | 12           | 5           | 14          | 12         |
| 3   | 22                                              | 26         | 11         | 15          | 22         | 3            | 12           | 5           | 14          | 12         |
| 4   | 22                                              | 26         | 17         | 15          | 19         | 3            | 12           | 5           | 14          | 12         |
| 5   | 24                                              | 26         | 11         | 15          | 19         | 3            | 12           | 5           | 14          | 12         |
| 6   | 24                                              | 26         | 11         | 17          | 19         | 3            | 12           | 5           | 14          | 12         |
| 7   | 22                                              | 40         | 11         | 17          | 29         | 3            | 24           | 24          | 26          | 25         |
| 8   | 22                                              | 41         | 11         | 17          | 29         | 3            | 12           | 24          | 26          | 25         |
| 9   | 22                                              | 41         | 11         | 23          | 19         | 3            | 12           | 5           | 26          | 25         |
| 10  | 24                                              | 43         | 11         | 23          | 19         | 3            | 12           | 5           | 26          | 29         |
| 11  | 24                                              | 41         | 11         | 23          | 19         | 3            | 12           | 5           | 26          | 29         |
| 12  | 23                                              | 26         | 11         | 17          | 19         | 3            | 12           | 5           | 14          | 12         |
| 13  | 19                                              | 26         | 11         | 17          | 19         | 3            | 12           | 5           | 14          | 12         |
| 14  | 51                                              | 25         | 16         | 17          | 30         | 21           | 26           | 26          | 14          | 28         |
| 15  | 51                                              | 42         | 23         | 17          | 30         | 21           | 26           | 26          | 14          | 28         |
| 16  | 50                                              | 26         | 11         | 17          | 19         | 3            | 12           | 5           | 14          | 12         |
| 17  | 52                                              | 30         | 16         | 22          | 23         | 3            | 18           | 5           | 14          | 16         |
| 18  | 23                                              | 30         | 16         | 13          | 23         | 3            | 18           | 5           | 14          | 16         |
| 19  | 19                                              | 30         | 16         | 10          | 23         | 3            | 18           | 5           | 14          | 16         |
| 20  | 40                                              | 30         | 16         | 13          | 23         | 3            | 18           | 5           | 14          | 16         |
| 21  | 23                                              | 30         | 11         | 13          | 1          | 3            | 18           | 5           | 14          | 16         |
| 22  | 6                                               | 29         | 16         | 12          | 8          | 3            | 12           | 5           | 19          | 15         |
| 23  | 21                                              | 28         | 15         | 12          | 8          | 3            | 17           | 15          | 28          | 18         |

Table S1. (continued).

| Allele number codes for each locus <sup>a</sup> |     |     |     |      |     |       |       |      |      |     |
|-------------------------------------------------|-----|-----|-----|------|-----|-------|-------|------|------|-----|
| CST                                             | asd | edD | gap | glnD | gnd | nuoE1 | ordL2 | recA | sucA | zwf |
| 24                                              | 49  | 45  | 17  | 12   | 8   | 3     | 7     | 5    | 19   | 27  |
| 25                                              | 19  | 25  | 5   | 12   | 18  | 3     | 7     | 5    | 15   | 13  |
| 26                                              | 23  | 30  | 22  | 13   | 23  | 3     | 17    | 5    | 25   | 24  |
| 27                                              | 19  | 1   | 14  | 14   | 21  | 3     | 13    | 5    | 16   | 9   |
| 28                                              | 23  | 19  | 16  | 13   | 23  | 3     | 18    | 5    | 14   | 16  |
| 29                                              | 19  | 7   | 12  | 10   | 8   | 3     | 13    | 5    | 16   | 9   |
| 30                                              | 6   | 7   | 7   | 10   | 8   | 3     | 7     | 5    | 7    | 9   |
| 31                                              | 20  | 7   | 13  | 13   | 20  | 14    | 7     | 5    | 17   | 14  |
| 32                                              | 19  | 7   | 13  | 13   | 20  | 3     | 7     | 5    | 17   | 14  |
| 33                                              | 42  | 39  | 21  | 20   | 28  | 19    | 23    | 20   | 24   | 23  |
| 34                                              | 41  | 38  | 20  | 19   | 27  | 18    | 22    | 21   | 23   | 22  |
| 35                                              | 41  | 1   | 20  | 19   | 27  | 18    | 21    | 21   | 23   | 22  |
| 36                                              | 40  | 37  | 19  | 21   | 27  | 20    | 25    | 25   | 27   | 26  |
| 37                                              | 40  | 37  | 19  | 18   | 19  | 17    | 21    | 22   | 22   | 21  |
| 38                                              | 40  | 39  | 19  | 18   | 27  | 17    | 21    | 22   | 22   | 21  |
| 39                                              | 40  | 3   | 19  | 18   | 27  | 17    | 21    | 22   | 22   | 21  |
| 40                                              | 1   | 6   | 4   | 6    | 3   | 3     | 5     | 4    | 5    | 1   |
| 41                                              | 4   | 3   | 1   | 11   | 11  | 1     | 1     | 12   | 1    | 1   |
| 42                                              | 1   | 1   | 5   | 3    | 2   | 1     | 1     | 1    | 3    | 1   |
| 43                                              | 1   | 1   | 3   | 3    | 2   | 1     | 1     | 1    | 3    | 1   |
| 44                                              | 1   | 5   | 4   | 4    | 1   | 1     | 1     | 1    | 4    | 1   |
| 45                                              | 14  | 5   | 4   | 4    | 1   | 1     | 1     | 1    | 4    | 1   |
| 46                                              | 1   | 4   | 1   | 1    | 1   | 1     | 3     | 1    | 1    | 3   |

Table S1. (continued).

| CST | Allele number codes for each locus <sup>a</sup> |     |     |      |     |       |       |      |      |     |
|-----|-------------------------------------------------|-----|-----|------|-----|-------|-------|------|------|-----|
|     | asd                                             | edD | gap | glnD | gnd | nuoE1 | ordL2 | recA | sucA | zwf |
| 47  | 1                                               | 1   | 1   | 7    | 1   | 1     | 1     | 1    | 1    | 1   |
| 48  | 1                                               | 1   | 1   | 1    | 1   | 1     | 1     | 1    | 1    | 1   |
| 49  | 1                                               | 19  | 1   | 1    | 1   | 1     | 1     | 1    | 1    | 1   |
| 50  | 1                                               | 3   | 1   | 1    | 1   | 1     | 1     | 1    | 1    | 1   |
| 51  | 53                                              | 46  | 26  | 24   | 31  | 23    | 27    | 27   | 29   | 30  |
| 52  | 2                                               | 2   | 2   | 3    | 13  | 2     | 8     | 2    | 2    | 2   |
| 53  | 2                                               | 2   | 2   | 2    | 12  | 2     | 2     | 2    | 2    | 2   |
| 54  | 2                                               | 2   | 2   | 2    | 2   | 2     | 2     | 2    | 2    | 2   |
| 55  | 10                                              | 9   | 2   | 2    | 12  | 2     | 2     | 2    | 2    | 2   |
| 56  | 15                                              | 15  | 2   | 4    | 14  | 6     | 2     | 8    | 2    | 2   |
| 57  | 9                                               | 2   | 2   | 2    | 13  | 5     | 2     | 2    | 2    | 2   |
| 58  | 15                                              | 9   | 2   | 2    | 13  | 4     | 2     | 6    | 2    | 10  |
| 59  | 3                                               | 9   | 2   | 7    | 13  | 4     | 2     | 2    | 2    | 2   |
| 60  | 15                                              | 9   | 2   | 3    | 13  | 4     | 2     | 2    | 2    | 2   |
| 61  | 54                                              | 47  | 27  | 25   | 32  | 24    | 28    | 28   | 30   | 31  |

<sup>a</sup>*asd*, aspartate-semialdehyde dehydrogenase; *edd*, phosphogluconate dehydratase; *gap*, glyceraldehyde 3-phosphate dehydrogenase; *glnD*, protein-P<sub>II</sub> uridylyltransferase; *gnd*, 6-phosphogluconate dehydrogenase; *nuoE1*, NADH dehydrogenase I chain E protein; *ordL2*, putative oxidoreductase protein; *recA*, DNA strand exchange and recombination protein; *sucA*, 2-oxoglutarate dehydrogenase E1; *zwf*, glucose-6-phosphate 1-dehydrogenase.

TABLE S2. Symbiotic effectiveness of nine *Trigonella* strains on six-week-old seedlings of *Trigonella suavissima*, *T. anguina*, and *Medicago sativa*.

| Strain       | Seedling shoot dry weight <sup>a</sup> |                               |                            |
|--------------|----------------------------------------|-------------------------------|----------------------------|
|              | (host species)                         |                               |                            |
|              | <i>Trigonella<br/>suavissima</i>       | <i>Trigonella<br/>anguina</i> | <i>Medicago<br/>sativa</i> |
|              | (mg/plant)                             |                               |                            |
| CC2283c      | 8.5 ± 0.8                              | 6.3 ± 1.2                     | 3.2 ± 0.6                  |
| CC2155b      | 8.1 ± 1.8                              | 4.5 ± 0.9                     | 3.9 ± 0.9                  |
| CC5037       | 7.5 ± 0.7                              | 5.7 ± 1.3                     | 4.7 ± 0.9                  |
| CC2017       | 7.1 ± 1.6                              | 6.9 ± 1.3                     | 8.9 ± 1.3                  |
| USDA6670     | 6.1 ± 1.7                              | 5.9 ± 1.4                     | 8.8 ± 1.1                  |
| CC5033       | 6.1 ± 0.4                              | 6.7 ± 1.7                     | 4.7 ± 0.7                  |
| CC2325       | 5.9 ± 0.5                              | 10.1 ± 2.0                    | 5.6 ± 0.4                  |
| CC5043       | 4.5 ± 0.6                              | 2.5 ± 0.6                     | 4.3 ± 0.5                  |
| CC2157       | 3.0 ± 0.8                              | 3.7 ± 1.1                     | 4.7 ± 1.1                  |
| uninoculated | 2.2 ± 0.3                              | 3.9 ± 1.4                     | 3.6 ± 0.7                  |
| + N control  | 11.3 ± 2.4                             | 12.8 ± 2.1                    | 14.1 ± 2.1                 |

<sup>a</sup>Average of five replicate seedlings ± SE. A comparison of shoot dry weights between strains and among host species

was conducted using a two-way ANOVA. The analysis revealed no significant differences between host species, and significant differences (by Tukey's HSD) between strains  $F(8,108) = 4.32$   $p < 0.0001$ .

TABLE S3. GenBank accession numbers for sequences included in the MLST analyses.

| <u>Locus and allele</u> | <u>Accession number</u> |
|-------------------------|-------------------------|
| asd_allele1             | DQ423249                |
| asd_allele2             | DQ423250                |
| asd_allele3             | DQ423251                |
| asd_allele4             | DQ423252                |
| asd_allele6             | DQ423254                |
| asd_allele9             | DQ423257                |
| asd_allele10            | DQ423258                |
| asd_allele14            | DQ423262                |
| asd_allele15            | DQ423263                |
| asd_allele19            | KX896263                |
| asd_allele20            | KX896264                |
| asd_allele21            | KX896265                |
| asd_allele22            | KX896266                |
| asd_allele23            | KX896267                |
| asd_allele24            | KX896268                |
| asd_allele40            | KX896269                |
| asd_allele41            | KX896270                |
| asd_allele42            | KX896271                |
| asd_allele49            | KX896272                |
| asd_allele50            | KX896273                |
| asd_allele51            | KX896274                |
| asd_allele52            | KX896275                |
| asd_allele53            | ATYB01000014            |
| asd_allele54            | KX896276                |

Table S3. (continued)

| <u>Locus and allele</u> | <u>Accession number</u> |
|-------------------------|-------------------------|
| dak_allele1             | GQ507067                |
| dak_allele2             | GQ507068                |
| dak_allele3             | GQ507069                |
| dak_allele5             | GQ507071                |
| dak_allele9             | GQ507075                |
| dak_allele16            | GQ507082                |
| dak_allele19            | KX896381                |
| dak_allele20            | KX896382                |
| dak_allele21            | KX896383                |
| dak_allele22            | KX896384                |
| dak_allele23            | ATYB01000008            |
| dak_allele24            | KX896385                |
| edd_allele1             | DQ423265                |
| edd_allele2             | DQ423266                |
| edd_allele3             | DQ423267                |
| edd_allele4             | DQ423268                |
| edd_allele5             | DQ423269                |
| edd_allele6             | DQ423270                |
| edd_allele7             | DQ423271                |
| edd_allele9             | DQ423273                |
| edd_allele15            | DQ423279                |
| edd_allele19            | EF428946                |
| edd_allele25            | KX896277                |
| edd_allele26            | KX896278                |



Table S3. (continued)

| <u>Locus and allele</u> | <u>Accession number</u> |
|-------------------------|-------------------------|
| edd_allele28            | KX896279                |
| edd_allele29            | KX896280                |
| edd_allele30            | KX896281                |
| edd_allele37            | KX896282                |
| edd_allele38            | KX896283                |
| edd_allele39            | KX896284                |
| edd_allele40            | KX896285                |
| edd_allele41            | KX896286                |
| edd_allele42            | KX896287                |
| edd_allele43            | KX896288                |
| edd_allele45            | KX896289                |
| edd_allele46            | ATYB01000014            |
| edd_allele47            | KX896290                |
| <br>                    |                         |
| gabT_allele1            | GQ507162                |
| gabT_allele2            | GQ507163                |
| gabT_allele4            | GQ507165                |
| gabT_allele6            | GQ507167                |
| gabT_allele9            | GQ507170                |
| gabT_allele10           | GQ507171                |
| gabT_allele15           | GQ507176                |
| gabT_allele20           | GQ507181                |
| gabT_allele25           | KX896386                |
| gabT_allele26           | KX896387                |
| gabT_allele27           | ATYB01000008            |

Table S3. (continued)

| <u>Locus and allele</u> | <u>Accession number</u> |
|-------------------------|-------------------------|
| gabT_allele28           | KX896388                |
| gap_allele1             | DQ423283                |
| gap_allele2             | DQ423284                |
| gap_allele3             | DQ423285                |
| gap_allele4             | DQ423286                |
| gap_allele5             | DQ423287                |
| gap_allele7             | DQ423289                |
| gap_allele11            | KX896291                |
| gap_allele12            | KX896292                |
| gap_allele13            | KX896293                |
| gap_allele14            | KX896294                |
| gap_allele15            | KX896295                |
| gap_allele16            | KX896296                |
| gap_allele17            | KX896297                |
| gap_allele19            | KX896298                |
| gap_allele20            | KX896299                |
| gap_allele21            | KX896300                |
| gap_allele22            | KX896301                |
| gap_allele23            | KX896302                |
| gap_allele26            | AM295420                |
| gap_allele27            | KX896303                |
| glnD_allele1            | DQ423292                |

Table S3. (continued)

| <u>Locus and allele</u> | <u>Accession number</u> |
|-------------------------|-------------------------|
| glnD_allele2            | DQ423293                |
| glnD_allele3            | DQ423294                |
| glnD_allele4            | DQ423295                |
| glnD_allele6            | DQ423297                |
| glnD_allele7            | DQ423298                |
| glnD_allele10           | DQ423301                |
| glnD_allele11           | EF428952                |
| glnD_allele12           | KX896304                |
| glnD_allele13           | KX896305                |
| glnD_allele14           | KX896306                |
| glnD_allele15           | KX896307                |
| glnD_allele17           | KX896308                |
| glnD_allele18           | KX896309                |
| glnD_allele19           | KX896310                |
| glnD_allele20           | KX896311                |
| glnD_allele21           | KX896312                |
| glnD_allele22           | KX896313                |
| glnD_allele23           | KX896314                |
| glnD_allele24           | ATYB01000014            |
| glnD_allele25           | KX896315                |
| <br>                    |                         |
| gnd_allele1             | DQ423302                |
| gnd_allele2             | DQ423303                |
| gnd_allele3             | DQ423304                |
| gnd_allele8             | DQ423309                |

Table S3. (continued)

| <u>Locus and allele</u> | <u>Accession number</u> |
|-------------------------|-------------------------|
| gnd_allele11            | JN685647                |
| gnd_allele12            | GQ338840                |
| gnd_allele13            | GQ338841                |
| gnd_allele14            | GQ338842                |
| gnd_allele18            | KX896316                |
| gnd_allele19            | KX896317                |
| gnd_allele20            | KX896318                |
| gnd_allele21            | KX896319                |
| gnd_allele22            | KX896320                |
| gnd_allele23            | KX896321                |
| gnd_allele27            | KX896322                |
| gnd_allele28            | KX896323                |
| gnd_allele29            | KX896324                |
| gnd_allele30            | KX896325                |
| gnd_allele31            | ATYB01000014            |
| gnd_allele32            | KX896326                |
| idhA_allele2            | GQ507187                |
| idhA_allele4            | GQ507189                |
| idhA_allele10           | GQ507195                |
| idhA_allele11           | GQ507196                |
| idhA_allele24           | GQ507209                |
| idhA_allele25           | GQ507210                |
| idhA_allele28           | KX896389                |
| idhA_allele29           | KX896390                |

Table S3. (continued)

| <u>Locus and allele</u> | <u>Accession number</u> |
|-------------------------|-------------------------|
| idhA_allele30           | KX896391                |
| idhA_allele31           | ATYB01000008            |
| idhA_allele32           | KX896392                |
| nifD_allele1            | GQ507237                |
| nifD_allele2            | GQ507238                |
| nifD_allele3            | GQ507239                |
| nifD_allele6            | GQ507242                |
| nifD_allele7            | GQ507243                |
| nifD_allele9            | GQ507245                |
| nifD_allele12           | GQ507248                |
| nifD_allele15           | GQ507251                |
| nifD_allele17           | GQ507253                |
| nifD_allele22           | GQ507258                |
| nifD_allele51           | KX896393                |
| nifD_allele52           | ATYB01000010            |
| nifD_allele53           | KX896394                |
| nodC_allele2            | EF428921                |
| nodC_allele3            | EF428922                |
| nodC_allele4            | GQ507336                |
| nodC_allele7            | GQ507339                |
| nodC_allele11           | GQ507343                |
| nodC_allele15           | GQ507347                |
| nodC_allele17           | GQ507349                |

Table S3. (continued)

| <u>Locus and allele</u> | <u>Accession number</u> |
|-------------------------|-------------------------|
| nodC_allele22           | GQ507354                |
| nodC_allele32           | GQ507364                |
| nodC_allele52           | ATYB01000010            |
| nodC_allele53           | KX896395                |
| nuoE_allele1            | DQ423310                |
| nuoE_allele2            | DQ423311                |
| nuoE_allele3            | DQ423312                |
| nuoE_allele4            | DQ423313                |
| nuoE_allele5            | DQ423314                |
| nuoE_allele6            | DQ423315                |
| nuoE_allele14           | KX896327                |
| nuoE_allele17           | KX896328                |
| nuoE_allele18           | KX896329                |
| nuoE_allele19           | KX896330                |
| nuoE_allele20           | KX896331                |
| nuoE_allele21           | KX896332                |
| nuoE_allele23           | ATYB01000014            |
| nuoE_allele24           | KX896333                |
| ordL2_allele1           | DQ423321                |
| ordL2_allele2           | DQ423322                |
| ordL2_allele3           | DQ423323                |
| ordL2_allele5           | DQ423325                |
| ordL2_allele7           | DQ423327                |

Table S3. (continued)

| <u>Locus and allele</u> | <u>Accession number</u> |
|-------------------------|-------------------------|
| ordL2_allele8           | DQ423328                |
| ordL2_allele12          | KX896334                |
| ordL2_allele13          | KX896335                |
| ordL2_allele17          | KX896336                |
| ordL2_allele18          | KX896337                |
| ordL2_allele21          | KX896338                |
| ordL2_allele22          | KX896339                |
| ordL2_allele23          | KX896340                |
| ordL2_allele24          | KX896341                |
| ordL2_allele25          | KX896342                |
| ordL2_allele26          | KX896343                |
| ordL2_allele27          | ATYB01000014            |
| ordL2_allele28          | KX896344                |
| recA_allele1            | DQ423330                |
| recA_allele1            | DQ423331                |
| recA_allele1            | DQ423333                |
| recA_allele1            | DQ423334                |
| recA_allele1            | DQ423335                |
| recA_allele1            | DQ423337                |
| recA_allele12           | EF428959                |
| recA_allele15           | KX896345                |
| recA_allele20           | KX896346                |
| recA_allele21           | KX896347                |
| recA_allele22           | KX896348                |

Table S3. (continued)

| <u>Locus and allele</u> | <u>Accession number</u> |
|-------------------------|-------------------------|
| recA_allele24           | KX896349                |
| recA_allele25           | KX896350                |
| recA_allele26           | KX896351                |
| recA_allele27           | AM182130                |
| recA_allele28           | AM946576                |
| <br>                    |                         |
| SMa0198_allele2         | GQ507303                |
| SMa0198_allele3         | GQ507304                |
| SMa0198_allele4         | GQ507305                |
| SMa0198_allele6         | GQ507307                |
| SMa0198_allele13        | GQ507314                |
| SMa0198_allele14        | GQ507315                |
| SMa0198_allele18        | GQ507319                |
| SMa0198_allele20        | GQ507321                |
| SMa0198_allele22        | GQ507323                |
| SMa0198_allele31        | GQ507332                |
| SMa0198_allele32        | GQ507333                |
| SMa0198_allele33        | GQ507334                |
| SMa0198_allele34        | KX896396                |
| SMa0198_allele35        | ATYB01000009            |
| SMa0198_allele36        | KX896397                |
| <br>                    |                         |
| sucA_allele1            | DQ423340                |
| sucA_allele2            | DQ423341                |



Table S3. (continued)

| <u>Locus and allele</u> | <u>Accession number</u> |
|-------------------------|-------------------------|
| sucA_allele3            | DQ423342                |
| sucA_allele4            | DQ423343                |
| sucA_allele5            | DQ423344                |
| sucA_allele7            | DQ423346                |
| sucA_allele14           | KX896352                |
| sucA_allele15           | KX896353                |
| sucA_allele16           | KX896354                |
| sucA_allele17           | KX896355                |
| sucA_allele19           | KX896356                |
| sucA_allele22           | KX896357                |
| sucA_allele23           | KX896358                |
| sucA_allele24           | KX896359                |
| sucA_allele25           | KX896360                |
| sucA_allele26           | KX896361                |
| sucA_allele27           | KX896362                |
| sucA_allele28           | KX896363                |
| sucA_allele29           | ATYB01000014            |
| sucA_allele30           | KX896364                |
| zwf_allele1             | DQ423352                |
| zwf_allele2             | DQ423353                |
| zwf_allele3             | DQ423354                |
| zwf_allele9             | DQ423360                |
| zwf_allele10            | DQ423361                |
| zwf_allele12            | KX896365                |

Table S3. (continued)

| <u>Locus and allele</u> | <u>Accession number</u> |
|-------------------------|-------------------------|
| zwf_allele13            | KX896366                |
| zwf_allele14            | KX896367                |
| zwf_allele15            | KX896368                |
| zwf_allele16            | KX896369                |
| zwf_allele18            | KX896370                |
| zwf_allele21            | KX896371                |
| zwf_allele22            | KX896372                |
| zwf_allele23            | KX896373                |
| zwf_allele24            | KX896374                |
| zwf_allele25            | KX896375                |
| zwf_allele26            | KX896376                |
| zwf_allele27            | KX896377                |
| zwf_allele28            | KX896378                |
| zwf_allele29            | X896379                 |
| zwf_allele30            | ATYB01000014            |
| zwf_allele31            | KX896380                |
